# Supplementary material for: Cytosolic Phospholipase A2 Is Required for Fexofenadine’s Therapeutic Effects against Inflammatory Bowel Disease in Mice
Source: MDPI journal article supplement (doi:10.3390/ijms222011155), 2021-10-15
Supplement: s1 [file s1]

# Cytosolic Phospholipase A2 is Required for Fexofenadine's Therapeutic Effects Against Inflammatory Bowel Disease in Mice

Xiangli Zhao<sup>1</sup>, Ronghan Liu<sup>1</sup>, Yuehong Chen<sup>1</sup>, Aubryanna Hettinghouse<sup>1</sup>,

Chuan-ju Liu<sup>1,2,\*</sup>

**Supplementary Table S1.** Scoring of clinical symptoms. Clinical symptoms include rectal bleeding, body weight loss, and stool consistency.

| Score of Clinical indicators | symptoms            |
|------------------------------|---------------------|
| Rectal Bleeding              |                     |
| 0                            | negative            |
| 2                            | blood trace         |
| 4                            | gross blood         |
| Body weight loss             |                     |
| 0                            | less than 1%        |
| 1                            | between 5% and 10%  |
| 2                            | between 10% and 15% |
| 3                            | between 15% and 20% |
| 4                            | over 20%            |
| Stool consistency            |                     |
| 0                            | normal              |
| 2                            | loose stool         |
| 4                            | diarrhea            |

**Supplementary Table S2.** The comparison of the clinical symptoms among H1R KO mice, cPLA2 KO mice, and corresponding WT mice at experimental endpoint. DSS-induced colitis model was established in 8-week-old indicated mice with ad libitum access to with drinking water containing 3% DSS for 10 days, followed by normal drinking water for 3 days, and then sacrificed. Data are mean  $\pm$  SE; \*  $p < 0.05$ .

|                   | WT     | H1R KO | significance |
|-------------------|--------|--------|--------------|
| Bleeding score    | 2.8    | 2.5    | ns           |
| Stool score       | 2.7    | 2.4    | ns           |
| Body weight score | 0.78   | 0.81   | ns           |
| colon length      | 5.2 cm | 4.8 cm | ns           |

  

|                   | WT   | cPLA2 KO | significance |
|-------------------|------|----------|--------------|
| Bleeding score    | 2    | 1.6      | *            |
| Stool score       | 1.7  | 1.9      | ns           |
| Body weight score | 0.85 | 0.95     | ns           |
| colon length      | 4 cm | 4 cm     | ns           |

**The mean value of the clinical scores at endpoint day**
